# Supplementary material for: Specific Strains of Honeybee Gut Lactobacillus Stimulate Host Immune System to Protect against Pathogenic Hafnia alvei
Source: PubMed Central journal article supplement (PMC8729767; doi:10.1128/spectrum.01896-21), 2022-01-05
Supplement: spectrum01896-21_supp_1_seq8.pdf [file spectrum01896-21_supp_1_seq8.pdf]

## Supplemental Material

For: Specific strains of honeybee gut *Lactobacillus* stimulate host immune system to protect against pathogenic *Hafnia alvei*

Haoyu Lang, Huijuan Duan, Jieni Wang, Wenhao Zhang, Jun Guo, Xue Zhang, Xiaosong Hu, Hao Zheng,

| <b>Contents:</b>         | <b>Page</b> |
|--------------------------|-------------|
| Figure S1                | 2           |
| Figure S2                | 3           |
| Figure S3                | 4           |
| Figure S4                | 5           |
| Table S1                 | 6           |
| Table S2                 | 7           |
| Table S3                 | 8           |
| Supplementary References | 9           |

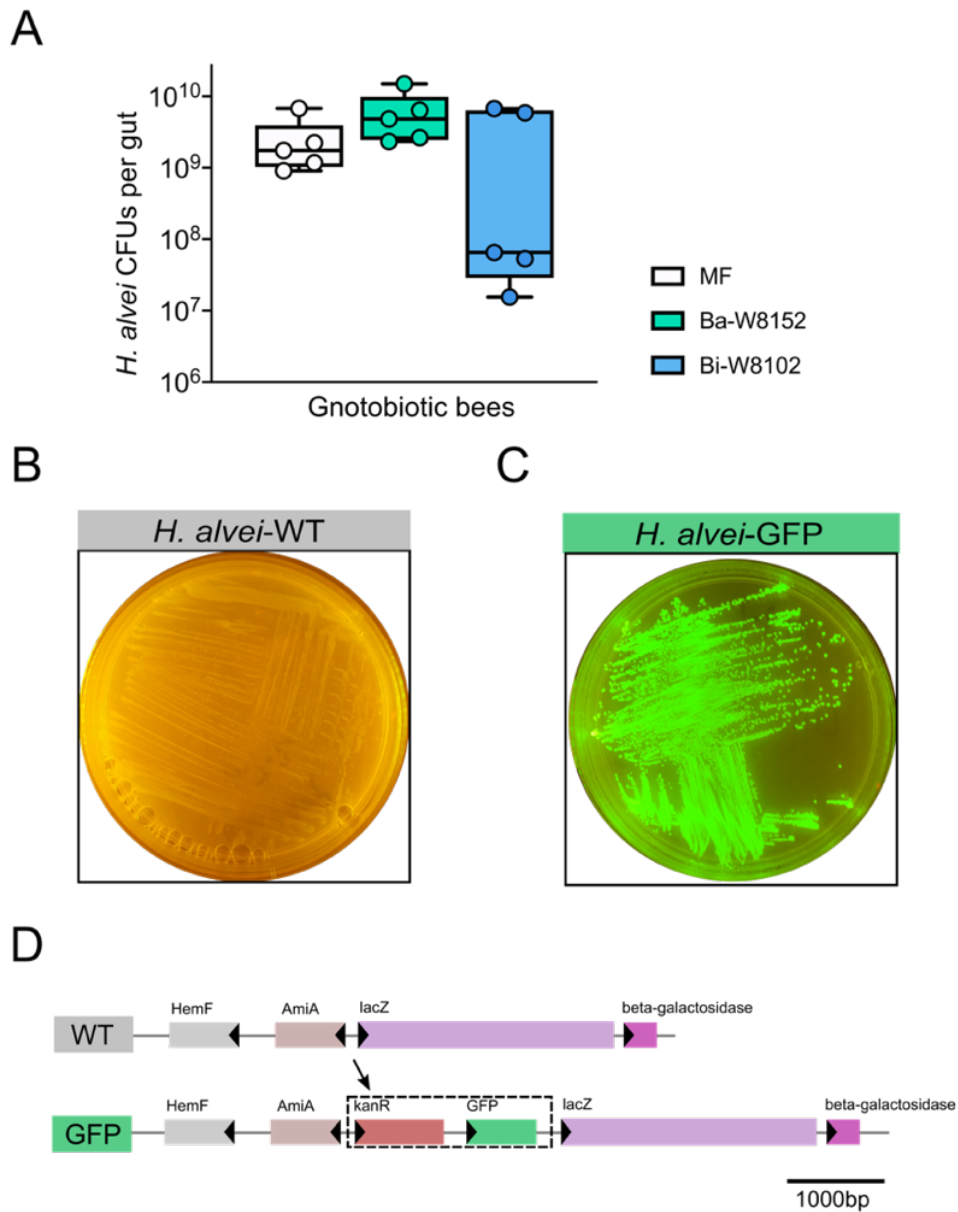

**FIG S1** *B. apousia* and *B. apis* strains did not protect against *H. alvei* infection in honeybee gut, and scheme for engineered *H. alvei* SMH01 mutant constitutively expressing the green fluorescent protein. (A) Absolute abundance of *H. alvei* of different treatment groups 5 days post-inoculation with *H. alvei*. Bees treated with *B. apousia* W8102 and *B. apis* W8152 do not affect the colonization of *H. alvei*. (B) Wild-type *H. alvei*. (C) Green fluorescent mutant *H. alvei*. (D) The GFP gene and the kanamycin resistance gene were knocked-in the chromosome downstream of the *lacZ* gene.

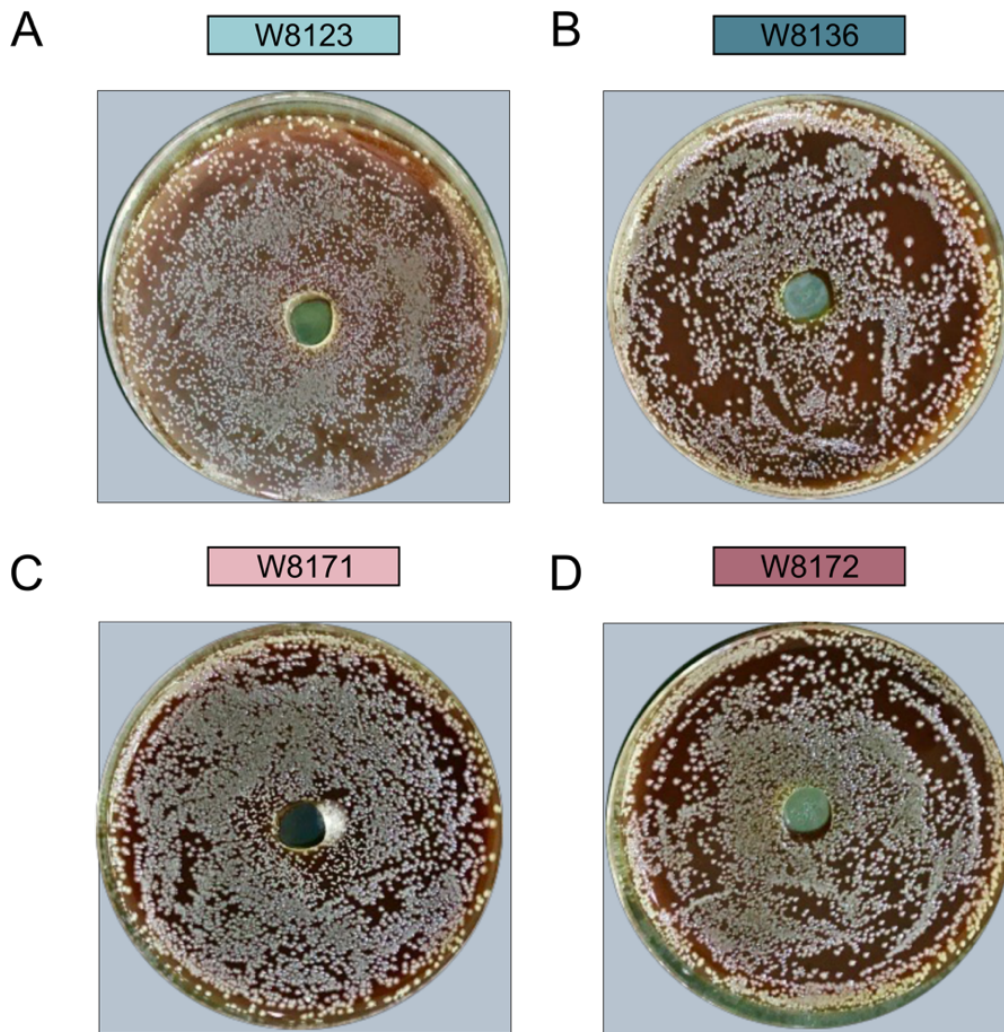

**FIG S2** *Gilliamella* and *Lactobacillus* strains did not protect against *H. alvei* infection in the honeybee gut. (A-D) The liquid cultures or cell-free supernatant of *G. apicola* W8136, *G. apis* W8123, *L. melliventris*, and *L. apis* W8172 did not inhibit the growth of *H. alvei* *in vitro*.

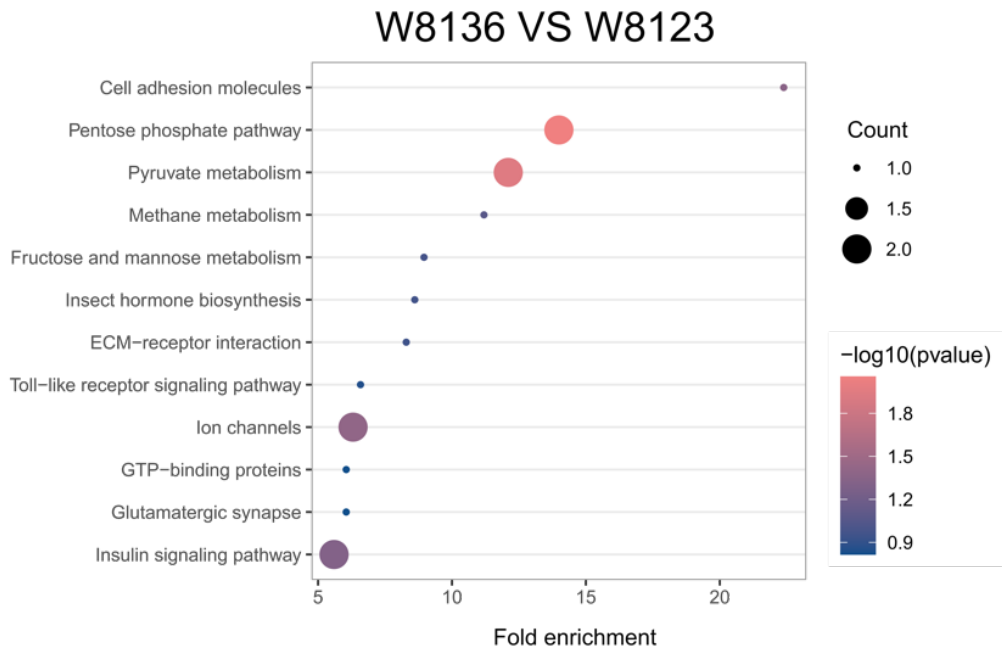

**FIG S3** KEGG analysis of the gut epithelial of honeybees mono-colonized with *Gilliamella*. Representative enriched KEGG pathways upregulated in the *G. apicola* W8136 group, compared to W8123.

A

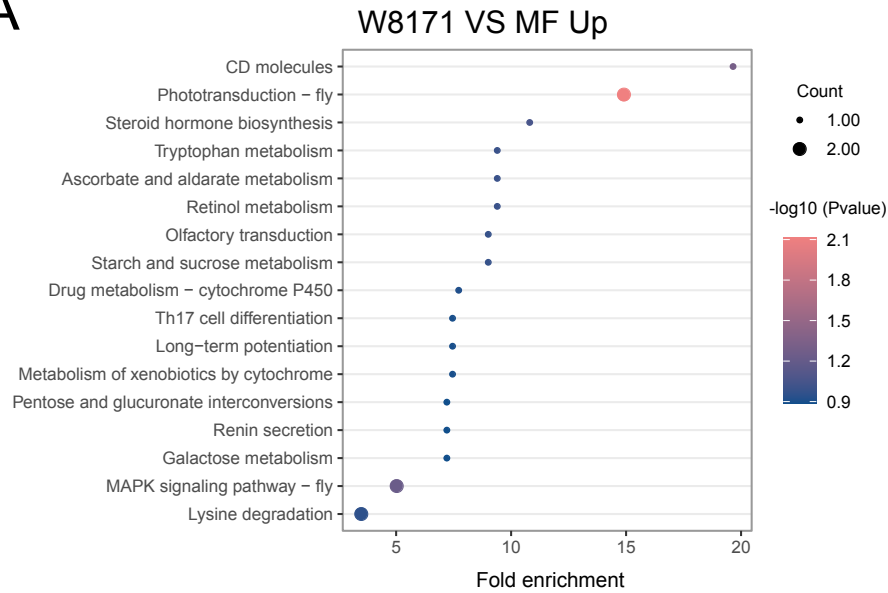

B

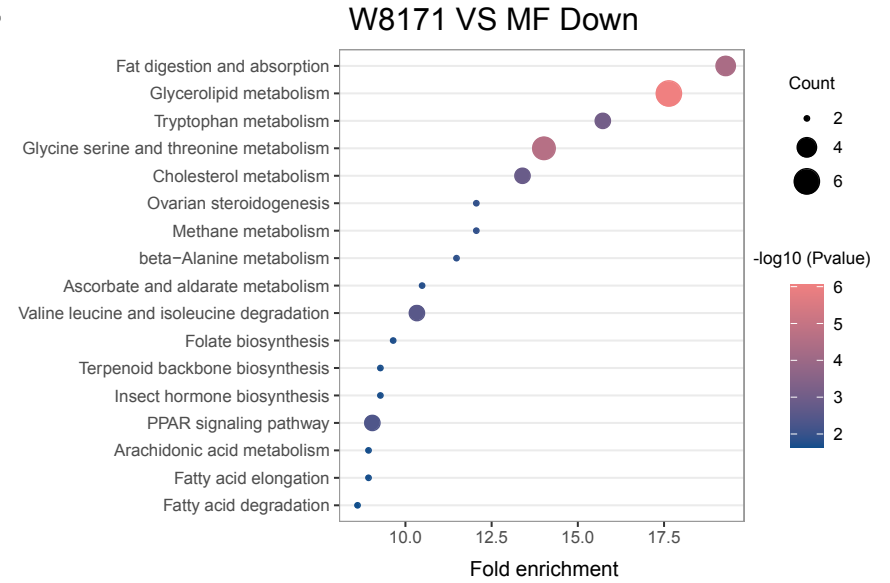

**FIG S4** KEGG analysis of the gut epithelial of honeybees mono-colonized with *L. melliventris* W8171. Representative enriched KEGG pathways up- (A) and down-regulated (B) in the *L. melliventris* W8171 group, compared to MF.

**Table S1.** qPCR primer sequences for gene expression analysis.

| <b>Gene</b>   | <b>Reference</b> | <b>Forward</b>         | <b>Reverse</b>          |
|---------------|------------------|------------------------|-------------------------|
| Abaecin       | (1)              | TCGGATTGAATGGTCCCTGAC  | ATCTTCGCACTACTCGCCAC    |
| Apidaecin     | (1)              | GTAGGTCGAGTAGGCGGATCT  | TTTTGCCTTAGCAATTCTTGTTG |
| Cactus-1      | (1)              | CTATCGTGGAGAAACTGCGTAT | TCAGGAAGTGGTTCTGGTATTG  |
| Cactus-2      | (1)              | ATCAGACGGCTCTGCTCTAT   | TCGTCTTCGTCAGTGGTATCT   |
| Dorsal        | (1)              | AGAGATGGAACGCAGGAAAC   | TGACAGGATATAGGACGAGGTAA |
| Dredd         | (1)              | GCGTCATAAAGAAAAAGGATCA | TTTCGGGTAATTGAGCAACG    |
| Hymenoptaecin | (1)              | GTCGTCCATCCTTGGACATT   | TTTCCCAAACCTCGAATCCTG   |
| PGRP-LC       | (1)              | TCCGTCAGCCGTAGTTTTTC   | CGTTTGTGCAAATCGAACAT    |
| Relish        | (1)              | GGAGCTGATCCAAATCGAAC   | AGTGGCATCCATCCATCATT    |
| RPS18         | (1)              | AGGTGTTGGTCGTCGTTAT    | CATTCTCCAGCACGCTTAT     |
| Toll          | (1)              | TAGAGTGGCGCATTGTCAAG   | ATCGCAATTTGTCCCAAAC     |
| Defensin-1    | (2)              | TGCGCTGCTAACTGTCTCAG   | AATGGCACTTAACCGAAACG    |
| Defensin-2    | (3)              | GCAACTACCGCCTTTACGTC   | GGGTAACGTGCGACGTTTTA    |
| Lysozyme      | (3)              | ACACGGTTGGTCACTGGTCC   | GTCCCACGCTTTGAATCCCT    |
| Actin         | (4)              | TGCCAACACTGTCCCTTTCTG  | AGAATTGACCCACCAATCCA    |

**Table S2.** AMPs used in this study.

| <b>AMPs</b>   | <b>Sequence</b>                                                                                    | <b>Length</b> | <b>Reference</b> |
|---------------|----------------------------------------------------------------------------------------------------|---------------|------------------|
| abaecin       | YVPLPNIPQPGRRPFPTFPGQGPFNPKIKWPQGY                                                                 | 34            | (5)              |
| apidaecin-1a  | GNNRPVYIPQPRPPHPRI                                                                                 | 18            | (6)              |
| apidaecin-1b  | GNNRPVYIPQPRPPHPRL                                                                                 | 18            | (6)              |
| defensin-1    | VTCDLLSFKGQVNSACAANCLSLGKAGGHCEKGVVICRKTSTFKDLWDKRFG                                               | 52            | (7)              |
| defensin-2    | VTCDVLSWQSKWLSINHSACAIRCLAQRRKGGSCRNGVICRKR                                                        | 43            | (7)              |
| hymenoptaecin | QERGSIVIQGTKEGRNRPSLDIDYKQRVYDKNGMTGDAYGGVNIRPGQPTRQHA<br>GFEEFGKEYKNGFIRGQSEVQRGPGGRLSPYVGINGGFRF | 93            | (8)              |

**Table S3.** Bacterial isolates used in this study.

| <b>Strain</b>                           | <b>Collection_site</b> | <b>Isolated medium</b> | <b>NCBI accession number</b> |
|-----------------------------------------|------------------------|------------------------|------------------------------|
| <i>Hafnia alvei</i> SMH01               | China: Jilin           | Heart infusion agar    | OK206815 (16S rRNA sequence) |
| <i>Bartonella apis</i> W8152            | China: Jilin           | Heart infusion agar    | GCF_016100395                |
| <i>Bifidobacterium asteroides</i> W8102 | China: Jilin           | Heart infusion agar    | GCF_007559275                |
| <i>Gilliamella apis</i> W8123           | China: Jilin           | Heart infusion agar    | GCF_016101085                |
| <i>Gilliamella apicola</i> W8136        | China: Jilin           | Heart infusion agar    | GCF_016101285                |
| <i>Lactobacillus melliventris</i> W8171 | China: Jilin           | MRS                    | GCF_016102065                |
| <i>Lactobacillus apis</i> W8172         | China: Jilin           | MRS                    | GCF_016102055                |



## Supplementary References

1. Horak R D, Leonard S P, Moran N A. Symbionts shape host innate immunity in honeybees. *Proc Biol Sci.* 2020; 287(1933):20201184.
2. Daisley B A, Pitek A P, Chmiel J A, Al K F, Chernyshova A M, Faragalla K M, et al. Novel probiotic approach to counter *Paenibacillus* larvae infection in honey bees. *ISME J.* 2020; 14(2):476-491.
3. Daisley B A, Pitek A P, Chmiel J A, Gibbons S, Chernyshova A M, Al K F, et al. *Lactobacillus* spp. attenuate antibiotic-induced immune and microbiota dysregulation in honey bees. *Commun Biol.* 2020; 3(1):534.
4. Kesnerova L, Emery O, Troilo M, Liberti J, Erkosar B, Engel P. Gut microbiota structure differs between honeybees in winter and summer. *ISME J.* 2020; 14(3):801-814.
5. Casteels P, Ampe C, Riviere L, Van Damme J, Elicone C, Fleming M, et al. Isolation and characterization of abaecin, a major antibacterial response peptide in the honeybee (*Apis mellifera*). *Eur J Biochem.* 1990; 187(2):381-386.
6. Welch N G, Li W, Hossain M A, Separovic F, O'Brien-Simpson N M, Wade J D. (Re)Defining the proline-rich antimicrobial peptide family and the Identification of putative new members. *Front Chem.* 2020; 8:607769.
7. Kludiny J, Albert S, Bachanova K, Kopernicky J, Simuth J. Two structurally different defensin genes, one of them encoding a novel defensin isoform, are expressed in honeybee *Apis mellifera*. *Insect Biochem Mol Biol.* 2005; 35(1):11-22.
8. Casteels P, Ampe C, Jacobs F, Tempst P. Functional and chemical characterization of Hymenoptaecin, an antibacterial polypeptide that is infection-inducible in the honeybee (*Apis mellifera*). *J Biol Chem.* 1993; 268(10):7044-7054.
